# Supplementary material
Source: PubMed Central journal article supplement (PMC5101150)
Supplement: NIHMS814491-supplement-1.pdf [file NIHMS814491-supplement-1.pdf]

Supplemental Information

for

**Direct IL-6 signals maximize protective secondary CD4 T cell responses against influenza**

Tara M. Strutt, Karl Kai McKinstry, Yi Kuang, Caroline Finn, Ji Hae Hwang, Kunal Dhume,

Stewart Sell, and Susan L. Swain

## Supplemental Figure 1

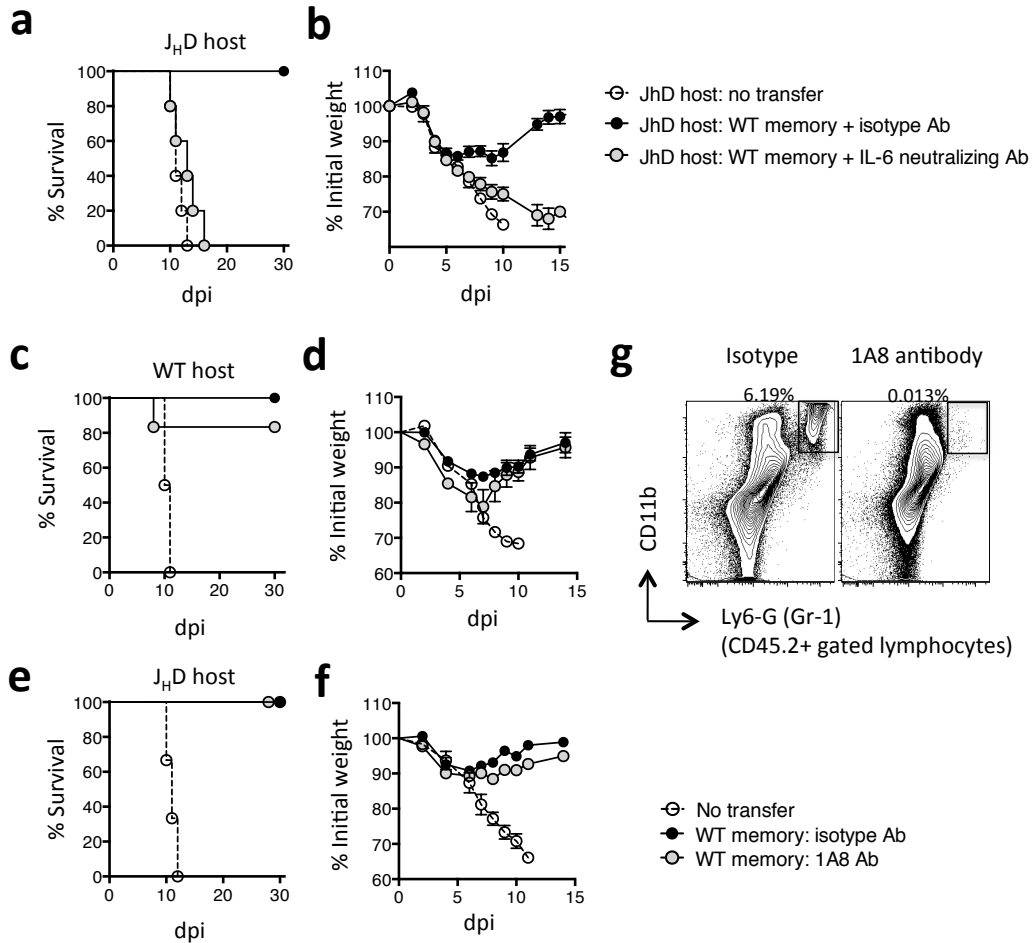

11

12 **Supplemental Figure 1:** *IL-6 enhances memory CD4 T cell-mediated protection independently*  
 13 *of B cell and neutrophils.* J<sub>H</sub>D host receiving  $5 \times 10^6$  memory HNT CD4 T cells were treated with  
 14 0.5 mg of isotype or IL-6 neutralizing Ab on days 0, 2, 4, 6, and 8-post challenge with 2,500  
 15 EID<sub>50</sub> A/PR8. Survival (**a**) and weight loss (**b**) was monitored (n=5 mice per group). Separate  
 16 WT and J<sub>H</sub>D mice receiving  $5 \times 10^6$  memory HNT CD4 T cells were challenged with a lethal dose  
 17 of A/PR8 (10,000 EID<sub>50</sub> for WT and 2,500 EID<sub>50</sub> J<sub>H</sub>D), and were treated with 0.5 mg of  
 18 neutrophil-depleting Ab (clone 1A8) or isotype control (2A3) on 0, 2, 4, and 6 dpi. Survival (**c**  
 19 and **e**) and weight loss (**d** and **f**) of each host was monitored (n = 2 for WT no transfer controls,  
 20 n=6 for memory WT recipients, and n=4 for all J<sub>H</sub>D host groups). Results summarize 2 replicate

21 experiments for each host. Representative staining (**g**) verifying the efficient depletion of  
22 neutrophils in the lungs of WT mice at 6 dpi. The depletion of neutrophils was as efficient in  
23 J<sub>H</sub>D hosts (not shown).

## Supplemental Figure 2

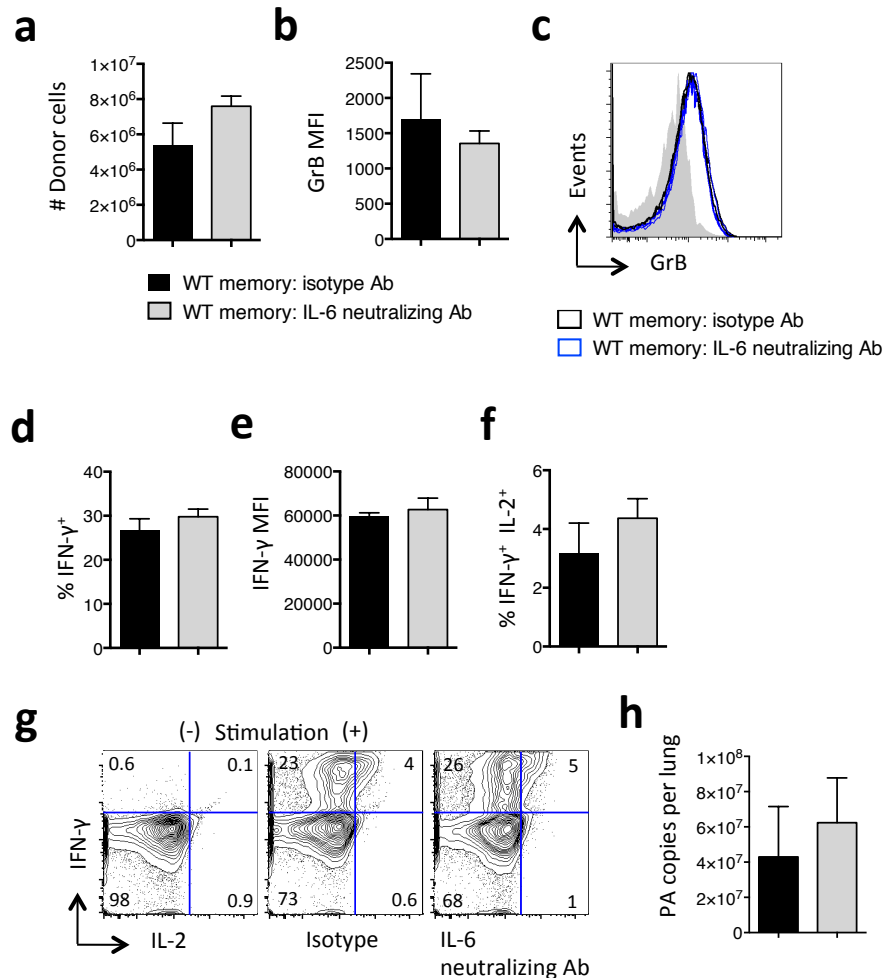

24

25 **Supplemental Figure 2.** Memory CD8 T cell recall is largely unaffected by IL-6. Memory CD8  
 26 T cells,  $1 \times 10^6$ , generated *in vitro* from naïve HA TcR Tg cells were transferred to unprimed WT  
 27 BALB/c subsequently infected with 2,500 EID<sub>50</sub> A/PR8. Groups of mice either received 0.5mg of  
 28 isotype or IL-6 neutralizing Ab on days 0, 2, 4, and 6 dpi. At 7 dpi, **(a)** the number of donor cells  
 29 in the lung, **(b)** donor granzyme B (GrB) expression as MFI, with representative staining shown  
 30 in **(c)**, the frequency of donor IFN- $\gamma$ <sup>+</sup> cells **(d)** and IFN- $\gamma$  MFI **(e)**, and dual IFN- $\gamma$ <sup>+</sup>IL-2<sup>+</sup> cytokine

31 production (**f**) was determined from 4 mice/group. Representative ICCS staining with and without  
32 stimulation is shown in (**g**). In separate experiments, viral titer (**h**) was determined at 7 dpi in mice  
33 that received  $5 \times 10^6$  memory CD8 T cells and were subsequently challenged with 2,500 EID<sub>50</sub>  
34 A/PR8, and treated with anti-IL-6 or isotype control Ab as above (n = 4 mice/group).

35
